# Supplementary material for: Genome-wide identification of nitrate transporter genes from Spirodela polyrhiza and characterization of SpNRT1.1 function in plant development
Source: Front Plant Sci. 2022 Aug 18;13:945470. doi: 10.3389/fpls.2022.945470 (PMC9436390; doi:10.3389/fpls.2022.945470)
Supplement: Supplementary file 1 [file Data_Sheet_1.xlsx]

## Sheet: Supplementary Table 1
Supplementary Table 1: PCR Primer
Primer Name	Primer Sequence	Reference
AD1	(AGCT)TCGA(G/C)T(A/T)T(G/C)G(A/T)GTT	Liu et al. 1995, 2007
AD2	NGTCGA(G/C)(A/T)GANA(A/T)GAA	Liu et al. 1995, 2007
AD3	(A/T)GTGNAG(A/T)ANCANAGA	Liu et al. 1995, 2007
R1	CGAACTGGTCCGATCCGAAG	This arctile
R2	TACAGCACCGCAAGCTGTAT	This arctile
R3	CGGCCGTTGAGATTGTCAGG	This arctile
SpNRT1.1-attBF	GGGGACAAGTTTGTACAAAAAAGCAGGCTTC-ATGGCCACTCTGCCGGAG	This arctile
SpNRT1.1-attBR	GGGGACCACTTTGTACAAGAAAGCTGGGTC-GACGTGGTGGGCCGTTTC	This arctile
SpNRT1.1-pHB-F	TGGATCCTCGAGCTGCAGGAGCTCATGGCGACGCTCCCTGAAAC	This arctile
SpNRT1.1-pHB-R	CCTTGCTCACCATACTAGTGAGCTCAACATGATGAGCAGTCTCAGCG	This arctile
QSpNRT1.1F	CTGCTGAACACACTGACGGA	This arctile
QSpNRT1.1R	GAAGGTGGTCATCTGAGCGT	This arctile
QSpActinF	AATGTTCCAGCCGTTTGTGC	This arctile
QSpActinR	ACCCACTTCACGCATCACTT	This arctile
QAtACTIN2-F	GCACCACCTGAAAGGAAGTACA	Wang et al., 2018
QAtACTIN2-R	CGATTCCTGGACCTGCCTCATC	Wang et al., 2018

## Sheet: Supplementary Table 2
Supplementary Table 2. SpNRT ID list
	Gene ID	Length		Gene ID	Length		Gene ID	Length
NRT1	Spipo12G0038100	596	NRT2	Spipo8G0057400	509	NRT3	Spipo13G0039300	197
	Spipo4G0106600	441		Spipo19G0017400	507
	Spipo4G0103800	556
	Spipo4G0105600	541
	Spipo4G0104400	529
	Spipo4G0063900	638
	Spipo4G0104900	548
	Spipo4G0104600	368
	Spipo4G0003200	582
	Spipo4G0106200	478
	Spipo4G0105800	536
	Spipo22G0027500	572
	Spipo22G0043000	566
	Spipo21G0020300	537
	Spipo15G0031400	587
	Spipo0G0188200	504
	Spipo0G0088000	627
	Spipo2G0059000	591
	Spipo8G0029500	710
	Spipo3G0094500	466
	Spipo17G0047200	486
	Spipo29G0014800	554
	Spipo14G0009000	569
	Spipo5G0029200	585
	Spipo5G0063000	609
	Spipo1G0085300	544
Too short be removed
	Spipo4G0106400	135
	Spipo4G0105200	151
	Spipo4G0105700	119
	Spipo4G0105100	98
	Spipo4G0106100	103
	Spipo4G0104300	246
	Spipo4G0106300	257
	Spipo0G0188700	274
	Spipo10G0046000	296

## Sheet: Supplementary Table 3
Supplementary Table 3. Gene ID list of NRT used in this paper
NRT1/PTR2	NRT2/MSF	NRT3/NAR2
AT2G02040.1	AT1G08090.1	AT4G24730.4
AT1G62200.1	AT1G08100.1	AT5G50200.1
AT1G12110.1	AT1G12940.1	Bradi3g47710.1.p
AT3G54140.1	AT3G45060.1	Bradi3g47720.1.p
AT5G01180.1	AT5G14570.1	LOC_Os02g38230.1
AT2G02020.1	AT5G60770.1	LOC_Os04g40410.1
AT1G27040.2	AT5G60780.1	MA_108756g0010
AT2G40460.1	Bradi2g40740.1.p	MA_11774g0010
AT1G69850.1	Bradi2g47640.1.p	MA_9694g0010
AT3G21670.1	Bradi3g01250.1.p	Pp3c18_3270V3.1.p
AT2G26690.1	Bradi3g01270.1.p	Pp3c21_13230V3.1.p
AT5G46050.1	Bradi3g01277.1.p	Pp3c22_21950V3.1.p
AT1G68570.1	Bradi3g01290.1.p	Potri.012G089300.1.p
AT5G46040.1	LOC_Os01g36720.1	Potri.015G085000.1.p
AT5G62730.1	LOC_Os01g50820.1	Potri.015G085100.1.p
AT1G33440.1	LOC_Os02g02170.1	227648
AT1G32450.1	LOC_Os02g02190.1	GSVIVT01007624001
AT1G72125.1	LOC_Os11g41850.1	Spipo13G0039300
AT1G22540.1	MA_28035g0010
AT1G59740.1	MA_80387g0010
AT1G72120.1	Pp3c16_10420V3.1.p
AT1G72140.1	Pp3c19_10820V3.1.p
AT3G54450.1	Pp3c19_10950V3.1.p
AT4G21680.1	Pp3c19_21550V3.1.p
AT1G22550.1	Pp3c22_21970V3.1.p
AT1G72130.1	Pp3c22_21990V3.1.p
AT1G22570.1	Pp3c22_5710V3.1.p
AT2G37900.1	Pp3c22_9060V3.1.p
AT3G53960.1	Pp3c7_13340V3.1.p
AT5G19640.1	Potri.001G348300.1.p
AT3G25280.1	Potri.004G213766.2.p
AT1G52190.1	Potri.009G008500.1.p
AT3G25260.1	Potri.012G087700.1.p
AT1G69870.1	Potri.015G081300.1.p
AT1G27080.1	Potri.015G081500.1.p
AT1G18880.1	136730
AT5G13400.1	163585
AT5G14940.1	168278
AT3G16180.1	422991
AT1G69860.1	Vocar.0008s0137.1.p
AT5G62680.1	Vocar.0008s0138.1.p
AT3G01350.1	Vocar.0008s0200.1.p
AT3G45720.1	GSVIVT01005870001
AT3G45710.1	GSVIVT01025721001
AT3G45680.1	GSVIVT01031518001
AT3G45700.1	GSVIVT01031522001
AT3G47960.1	Spipo8G0057400
AT3G45660.1	Spipo19G0017400
AT3G45650.1
AT5G28470.1
AT3G45690.1
AT5G11570.1
AT2G38100.1
Bradi1g10490.1.p
Bradi1g68860.4.p
Bradi1g68830.1.p
Bradi1g68837.1.p
Bradi2g02822.5.p
Bradi1g59840.1.p
Bradi3g16670.1.p
Bradi5g01737.2.p
Bradi1g21010.1.p
Bradi3g33030.1.p
Bradi3g33040.1.p
Bradi1g78330.1.p
Bradi1g72910.1.p
Bradi1g68850.2.p
Bradi1g37330.5.p
Bradi3g28400.1.p
Bradi1g68820.1.p
Bradi3g28410.4.p
Bradi3g47010.1.p
Bradi1g75820.2.p
Bradi2g41060.2.p
Bradi2g30380.1.p
Bradi3g28417.1.p
Bradi3g39040.3.p
Bradi3g53380.1.p
Bradi3g34590.1.p
Bradi2g57927.1.p
Bradi1g22087.1.p
Bradi1g25460.3.p
Bradi2g24327.1.p
Bradi3g52427.1.p
Bradi2g25417.2.p
Bradi2g56347.1.p
Bradi1g34610.1.p
Bradi4g17950.3.p
Bradi2g49808.2.p
Bradi1g43970.1.p
Bradi2g43917.2.p
Bradi5g20310.1.p
Bradi2g49817.1.p
Bradi3g52096.1.p
Bradi2g25460.2.p
Bradi2g56387.2.p
Bradi2g30437.1.p
Bradi2g56360.2.p
Bradi2g56450.1.p
Bradi5g10920.1.p
Bradi1g03500.1.p
Bradi4g00530.1.p
Bradi2g25430.1.p
Bradi1g12190.1.p
Bradi4g21790.1.p
Bradi3g34600.2.p
Bradi2g58470.1.p
Bradi1g78703.2.p
Bradi2g03560.1.p
Bradi2g24340.1.p
Bradi2g56397.1.p
Bradi5g20300.10.p
Bradi4g21150.1.p
Bradi5g20270.3.p
Bradi5g22260.1.p
Bradi5g27190.1.p
Bradi5g14410.1.p
Bradi5g27180.1.p
Bradi5g14400.1.p
Bradi4g39780.1.p
Bradi2g50570.1.p
Bradi2g56370.2.p
Bradi1g44670.1.p
Bradi2g50580.1.p
Bradi2g56380.1.p
Bradi4g21106.1.p
Bradi3g39990.2.p
Bradi5g14380.1.p
Bradi5g14390.3.p
Bradi2g27987.1.p
Bradi4g21130.3.p
Bradi2g17465.1.p
Bradi4g27787.1.p
LOC_Os03g51050.1
LOC_Os03g13240.2
LOC_Os01g04950.1
LOC_Os03g13250.1
LOC_Os07g01070.1
LOC_Os08g05910.1
LOC_Os10g02210.1
LOC_Os10g40600.1
LOC_Os10g22560.1
LOC_Os03g04570.1
LOC_Os03g01290.1
LOC_Os03g13274.1
LOC_Os06g38294.1
LOC_Os10g33210.1
LOC_Os10g02240.1
LOC_Os01g67630.2
LOC_Os10g02340.1
LOC_Os10g02220.1
LOC_Os01g37590.2
LOC_Os10g33170.1
LOC_Os04g39030.1
LOC_Os10g42870.1
LOC_Os05g27010.1
LOC_Os06g49250.2
LOC_Os10g02080.1
LOC_Os05g35650.1
LOC_Os05g34010.1
LOC_Os06g49220.1
LOC_Os02g47090.1
LOC_Os04g50940.2
LOC_Os10g02260.1
LOC_Os04g50950.1
LOC_Os07g41250.2
LOC_Os06g15370.1
LOC_Os05g33960.1
LOC_Os10g42900.1
LOC_Os06g49240.1
LOC_Os01g67640.1
LOC_Os03g60850.1
LOC_Os02g46460.2
LOC_Os10g02100.2
LOC_Os01g65200.3
LOC_Os01g54515.1
LOC_Os05g34030.1
LOC_Os12g44110.2
LOC_Os01g65210.1
LOC_Os01g01360.1
LOC_Os01g65110.1
LOC_Os11g12740.1
LOC_Os03g48180.1
LOC_Os01g65100.2
LOC_Os04g36040.1
LOC_Os06g21900.1
LOC_Os04g50930.1
LOC_Os01g68510.1
LOC_Os05g35594.1
LOC_Os11g17970.1
LOC_Os12g44100.1
LOC_Os11g18044.1
LOC_Os06g13210.2
LOC_Os04g41400.1
LOC_Os04g41450.1
LOC_Os04g56560.1
LOC_Os11g18110.1
LOC_Os06g13200.1
LOC_Os01g55600.1
LOC_Os12g12934.1
LOC_Os04g59480.1
LOC_Os01g55610.1
LOC_Os01g65190.1
LOC_Os01g65169.1
LOC_Os10g05780.1
LOC_Os01g65150.1
LOC_Os11g23890.1
LOC_Os05g27304.1
LOC_Os04g41410.1
LOC_Os01g65140.1
LOC_Os08g41590.1
LOC_Os05g34000.1
LOC_Os12g13790.1
LOC_Os01g65120.1
LOC_Os03g17770.1
LOC_Os02g52060.1
LOC_Os02g31980.1
LOC_Os12g15600.1
LOC_Os04g34640.1
LOC_Os09g16150.1
MA_10428144g0010
MA_119405g0010
MA_10437108g0010
MA_22044g0010
MA_72811g0010
MA_10427079g0030
MA_37390g0010
MA_10431946g0010
MA_5112g0010
MA_88051g0010
MA_656580g0010
MA_167141g0010
MA_81633g0010
MA_119911g0010
MA_129667g0010
MA_890631g0010
MA_52162g0010
MA_829823g0010
MA_24116g0010
MA_59489g0010
MA_10437108g0020
MA_10429197g0020
MA_93406g0010
MA_10263488g0010
MA_10435693g0020
MA_985g0020
MA_67552g0010
MA_10431577g0010
MA_10436042g0010
MA_411730g0010
MA_10437216g0010
MA_114170g0010
MA_408691g0010
MA_89317g0010
MA_9852g0010
MA_112703g0010
MA_122722g0010
MA_364465g0010
MA_54821g0010
MA_135648g0010
MA_138189g0010
MA_467252g0010
MA_7498g0010
MA_14333g0020
MA_10136262g0010
MA_492174g0020
MA_3421g0010
MA_135402g0010
MA_101290g0010
MA_121879g0010
MA_168457g0010
MA_192860g0010
MA_893759g0010
MA_122517g0010
MA_10435714g0010
MA_186200g0010
MA_6584770g0010
MA_9770591g0010
MA_10431195g0010
MA_107155g0010
MA_927631g0010
MA_85591g0010
MA_914159g0010
MA_139360g0010
MA_5519524g0010
MA_100154g0010
MA_698620g0010
MA_850814g0010
MA_4273216g0010
MA_10430246g0010
Pp3c8_15410V3.2.p
Pp3c13_4730V3.2.p
Pp3c11_5710V3.1.p
Pp3c1_31230V3.5.p
Pp3c17_17090V3.1.p
Pp3c17_16320V3.1.p
Pp3c4_21340V3.1.p
Pp3c20_18670V3.1.p
Pp3c7_13920V3.1.p
Pp3c22_14360V3.1.p
Pp3c4_21460V3.3.p
Pp3c12_4100V3.2.p
Pp3c20_6850V3.1.p
Pp3c6_18680V3.1.p
Pp3c14_23410V3.1.p
Pp3c1_38540V3.1.p
Pp3c6_10660V3.1.p
Pp3c5_16340V3.1.p
Pp3c9_14660V3.1.p
Pp3c17_20530V3.1.p
Pp3c4_7710V3.1.p
Pp3c5_1870V3.1.p
Potri.010G100200.1.p
Potri.011G120000.1.p
Potri.016G111900.1.p
Potri.001G248600.1.p
Potri.009G042400.1.p
Potri.016G111800.1.p
Potri.006G096800.1.p
Potri.003G111500.2.p
Potri.014G157500.3.p
Potri.019G055800.2.p
Potri.002G225500.2.p
Potri.002G029200.1.p
Potri.010G034300.1.p
Potri.012G070700.1.p
Potri.005G233500.1.p
Potri.002G258900.1.p
Potri.002G258700.1.p
Potri.010G068100.1.p
Potri.008G170100.1.p
Potri.002G129500.1.p
Potri.014G179400.2.p
Potri.013G106300.1.p
Potri.019G079600.2.p
Potri.010G126300.1.p
Potri.006G034000.2.p
Potri.013G106400.1.p
Potri.013G106500.1.p
Potri.001G145200.1.p
Potri.003G088800.1.p
Potri.013G106900.2.p
Potri.T150600.1.p
Potri.019G067500.1.p
Potri.013G107000.2.p
Potri.T150700.2.p
Potri.003G197400.1.p
Potri.001G027100.1.p
Potri.013G106600.1.p
Potri.008G061100.1.p
Potri.016G032000.2.p
Potri.019G079700.1.p
Potri.003G000800.1.p
Potri.001G013400.1.p
Potri.006G092000.1.p
Potri.014G036200.1.p
Potri.003G212900.2.p
Potri.002G249100.1.p
Potri.004G229000.1.p
Potri.013G106700.1.p
Potri.016G103500.1.p
Potri.006G033900.1.p
Potri.004G064100.1.p
Potri.017G076800.1.p
Potri.012G071400.1.p
Potri.012G071500.1.p
Potri.001G351200.2.p
Potri.001G068600.2.p
Potri.010G034700.1.p
Potri.005G001400.1.p
Potri.001G185700.1.p
Potri.016G103200.1.p
Potri.017G152800.3.p
Potri.004G068500.1.p
Potri.001G272900.1.p
Potri.006G240000.1.p
Potri.006G091600.1.p
Potri.012G087500.1.p
Potri.008G045100.1.p
Potri.018G040900.1.p
Potri.018G040400.1.p
Potri.018G041800.1.p
Potri.018G041600.1.p
Potri.018G041700.1.p
Potri.018G040800.1.p
Potri.018G040700.1.p
Potri.018G040500.1.p
Potri.018G040600.1.p
Potri.018G041400.1.p
Potri.018G041500.2.p
Potri.019G079550.1.p
Potri.002G258832.1.p
Potri.018G040301.2.p
Potri.017G145500.1.p
Potri.017G076900.1.p
Potri.001G377000.2.p
Potri.T108532.1.p
97812
135536
441824
97239
439656
231062
103849
444106
232069
84173
97069
78769
165561
21315
97590
126973
97655
88337
234606
21531
91845
109515
91962
94418
443914
411211
231569
231570
97154
415640
135528
438080
404409
411213
78532
102834
92333
170934
114255
92183
119745
24108
404413
410482
Vocar.0049s0020.1.p
GSVIVT01026059001
GSVIVT01013493001
GSVIVT01034004001
GSVIVT01009804001
GSVIVT01035643001
GSVIVT01026067001
GSVIVT01008073001
GSVIVT01024796001
GSVIVT01026071001
GSVIVT01032716001
GSVIVT01030494001
GSVIVT01008064001
GSVIVT01015522001
GSVIVT01020076001
GSVIVT01027876001
GSVIVT01011908001
GSVIVT01028391001
GSVIVT01028392001
GSVIVT01025795001
GSVIVT01015523001
GSVIVT01011563001
GSVIVT01026070001
GSVIVT01026058001
GSVIVT01009579001
GSVIVT01026066001
GSVIVT01026065001
GSVIVT01018395001
GSVIVT01032603001
GSVIVT01021298001
GSVIVT01026072001
GSVIVT01026068001
GSVIVT01020084001
GSVIVT01031343001
GSVIVT01026064001
GSVIVT01001292001
GSVIVT01023146001
GSVIVT01037125001
GSVIVT01017052001
GSVIVT01025359001
GSVIVT01032550001
GSVIVT01016458001
GSVIVT01001106001
GSVIVT01025106001
GSVIVT01025107001
GSVIVT01015356001
GSVIVT01034071001
GSVIVT01008072001
GSVIVT01026062001
Spipo12G0038100
Spipo4G0106600
Spipo4G0103800
Spipo4G0105600
Spipo4G0104400
Spipo4G0063900
Spipo4G0104900
Spipo4G0104600
Spipo4G0003200
Spipo4G0106200
Spipo4G0105800
Spipo22G0027500
Spipo22G0043000
Spipo21G0020300
Spipo15G0031400
Spipo0G0188200
Spipo0G0088000
Spipo2G0059000
Spipo8G0029500
Spipo3G0094500
Spipo17G0047200
Spipo29G0014800
Spipo14G0009000
Spipo5G0029200
Spipo5G0063000
Spipo1G0085300

## Sheet: Supplementary Table 4
Supplementary Table 4. SRA data used in this paper
SRX7888915
SRX7888914
SRX7888913
SRX7888912
SRX7888911
SRX7888910
SRX7888909
SRX7888908
SRX7888907
SRX7888906
SRX7888905
SRX7888904
SRX7888903
SRX7888902
SRX7888901
SRX7888900
SRX7888899
SRX7888898
SRX7888897
SRX7888896
SRX7888895
SRX7888894
SRX7888893
SRX7888892
SRX7888891
SRX7888890
SRX7888889
SRX7888888
SRX7888887
SRX7888886
SRX7888885
SRX7888884
SRX6803783
SRX6803782
SRX6803781
SRX6803780
SRX6803779
SRX6803778
SRX6803777
SRX6803776
SRX6803775
SRX6803774
SRX6803773
SRX6803772
SRX6604612
SRX6604611
SRX6604610
SRX6604609
SRX6604608
SRX6604607
SRX6604606
SRX6604605
SRX6604604
SRX1521257
SRX1521256
SRX351029
SRX350990
SRX350953
SRX350757
SRX350756
SRX350755
SRX350679
SRX349443

## Sheet: Supplementary Table 5
Supplementary Table 5. Relative expression of SpNRT genes in various tissues
						stipules									leaves									Roots
Gene ID	Gene Name	Reference	Strand	Start	End	Coverage-1	Coverage-2	Coverage-3	FPKM-1	FPKM-2	FPKM-3	TPM-1	TPM-2	TPM-3	Coverage-1	Coverage-2	Coverage-3	FPKM-1	FPKM-2	FPKM-3	TPM-1	TPM-2	TPM-3	Coverage-1	Coverage-2	Coverage-3	FPKM-1	FPKM-2	FPKM-3	TPM-1	TPM-2	TPM-3
Spipo0G0088000.v2	SpNRT1.10	pseudo0	-	6547962	6551144	40.923	75.6115	51.7771	8.37177	14.2875	12.8168	9.7291	15.9356	15.4464	22.9644	15.7293	12.939	4.50106	3.00378	2.23056	4.76952	3.21563	2.31288	56.03	79.6508	52.6765	12.2117	15.7723	8.9168	14.5718	19.0514	11.0587
Spipo0G0188200.v2	SpNRT1.11	pseudo0	-	11521006	11522750	32.5001	43.4505	37.1696	6.64865	8.21036	9.2009	7.72661	9.15746	11.0886	1.06337	6.46403	7.88581	0.208421	1.23442	1.35944	0.220852	1.32147	1.40961	5.92899	2.48317	5.75544	1.29222	0.491713	0.974251	1.54196	0.593939	1.20828
Spipo1G0085300.v2	SpNRT1.1	pseudo1	+	5346030	5347873	1273.14	1549.06	1322.75	260.45	292.709	327.431	302.677	326.474	394.608	224.928	429.531	329.2	44.0862	82.0264	56.751	46.7157	87.8112	58.8455	574.754	813.058	672.586	125.267	161	113.852	149.477	194.472	141.2
Spipo2G0059000.v2	SpNRT1.6	pseudo2	-	4660756	4662973	6427.4	6832.77	6397.58	1314.88	1291.11	1583.64	1528.06	1440.05	1908.55	6.38851	10.4741	12.8688	1.25216	2.00021	2.21846	1.32684	2.14128	2.30034	110.211	88.6824	77.875	24.0204	17.5607	13.1823	28.6627	21.2116	16.3488
Spipo3G0094500.v2	SpNRT1.9	pseudo3	+	7404260	7407742	18.7695	19.4161	17.4347	3.83973	3.66885	4.31575	4.46227	4.09207	5.20119	5.99215	2.3576	5.54247	1.17447	0.450225	0.955471	1.24452	0.481977	0.990734	34.4283	17.0592	44.424	7.5036	3.37804	7.51986	8.9538	4.08033	9.3262
Spipo4G0003200.v2	SpNRT1.12	pseudo4	-	222375	226970	864.594	821.49	632.361	176.873	155.228	156.534	205.55	173.134	188.649	163.894	131.965	171.808	32.1235	25.2011	29.6182	34.0394	26.9783	30.7112	334.618	386.127	418.846	72.9295	76.4602	70.9	87.0244	92.3562	87.9309
Spipo4G0063900.v2	SpNRT1.13	pseudo4	+	5538377	5541091	1.26656	2.57381	2.19405	0.259105	0.486345	0.543112	0.301114	0.542447	0.654539	79.2916	51.3292	59.2702	15.5413	9.8022	10.2176	16.4682	10.4935	10.5947	23.6474	21.2097	19.4345	5.15392	4.19991	3.28978	6.15	5.07306	4.08001
Spipo4G0103800.v2	SpNRT1.14	pseudo4	-	7798272	7800211	2.90724	5.36804	3.40814	0.594745	1.01434	0.843644	0.691171	1.13135	1.01673	10.0563	11.7684	13.8749	1.97104	2.24738	2.39191	2.0886	2.40588	2.48019	18.8444	13.7169	22.8737	4.10712	2.7162	3.87194	4.90089	3.2809	4.80202
Spipo4G0104400.v2	SpNRT1.15	pseudo4	-	7826302	7828322	97.0768	113.499	89.673	19.8593	21.4466	22.1975	23.0792	23.9205	26.7516	27.1009	46.822	42.5176	5.31182	8.94148	7.32965	5.62863	9.57207	7.60015	48.256	37.7057	84.6814	10.5173	7.46641	14.3344	12.55	9.01867	17.7777
Spipo4G0104600.v2	SpNRT1.16	pseudo4	-	7836888	7838383	54.6179	63.8582	45.2602	11.1734	12.0666	11.2036	12.9849	13.4585	13.5022	27.0858	39.5438	30.4481	5.30886	7.55158	5.24897	5.62549	8.08415	5.44268	101.423	125.708	217.565	22.105	24.8925	36.8283	26.3771	30.0677	45.6749
Spipo4G0104900.v2	SpNRT1.17	pseudo4	-	7840223	7842218	90.6099	66.866	40.0966	18.5364	12.6349	9.92543	21.5417	14.0924	11.9618	20.8998	49.8018	39.7098	4.09639	9.51052	6.8456	4.34071	10.1812	7.09825	60.3965	27.1916	413.046	13.1633	5.38443	69.9182	15.7074	6.50384	86.7133
Spipo4G0105600.v2	SpNRT1.18	pseudo4	-	7861420	7863417	0.396001	1.15498	0.820233	0.081011	0.218244	0.203039	0.094146	0.243419	0.244695	10.7116	10.3601	14.0916	2.09948	1.97844	2.42927	2.2247	2.11797	2.51892	2.88561	0.852399	7.55105	0.628915	0.168791	1.2782	0.750464	0.203882	1.58524
Spipo4G0105800.v2	SpNRT1.19	pseudo4	-	7869588	7871714	0.429971	1.11817	1.03308	0.087961	0.211289	0.255727	0.102222	0.235662	0.308193	36.1387	18.8738	32.5948	7.08323	3.60427	5.61905	7.5057	3.85846	5.82643	2.36443	1.58644	4.13184	0.515324	0.314145	0.699416	0.614919	0.379455	0.867423
Spipo4G0106200.v2	SpNRT1.20	pseudo4	-	7881390	7883362	5.14449	4.75644	5.55569	1.05243	0.898772	1.37525	1.22306	1.00245	1.6574	2.37752	1.92102	2.91997	0.465998	0.366852	0.503376	0.493791	0.392724	0.521954	3.22477	4.24008	3.58525	0.702836	0.839614	0.606892	0.838671	1.01417	0.752673
Spipo4G0106600.v2	SpNRT1.21	pseudo4	-	7886885	7888290	68.3484	42.6787	82.9495	13.9823	8.06453	20.5332	16.2492	8.9948	24.7458	45.598	27.1229	42.8944	8.93727	5.1796	7.39461	9.47032	5.54488	7.66751	53.132	39.0158	79.6501	11.5801	7.72585	13.4827	13.8181	9.33204	16.7214
Spipo5G0029200.v2	SpNRT1.3	pseudo5	-	2200927	2203057	448.915	334.869	317.071	91.8361	63.2766	78.4872	106.726	70.5757	94.59	4.93402	136.284	56.1411	0.967074	26.0258	9.67821	1.02475	27.8612	10.0354	8.88225	6.74745	9.39875	1.93588	1.33612	1.59097	2.31002	1.6139	1.97314
Spipo5G0063000.v2	SpNRT1.8	pseudo5	+	5553121	5556355	8.65137	48.1421	6.41257	1.76984	9.09688	1.58736	2.05679	10.1462	1.91302	1.24863	8.81749	6.80213	0.244734	1.68385	1.17262	0.259331	1.80261	1.2159	601.43	823.328	1727.12	131.081	163.034	292.358	156.415	196.929	362.585
Spipo8G0029500.v2	SpNRT1.4	pseudo8	-	2876617	2884084	33.8176	35.2414	21.7201	6.91819	6.65919	5.37655	8.03985	7.42735	6.47964	12.9557	6.26817	13.186	2.53934	1.19702	2.27315	2.6908	1.28144	2.35704	22.0131	27.7042	21.5971	4.79774	5.48593	3.65584	5.72498	6.62645	4.534
Spipo8G0057400.v2	SpNRT2.1	pseudo8	+	4572055	4573747	618.214	1126.22	259.078	126.47	212.81	64.1318	146.975	237.358	77.2894	1648.35	1012.12	1240.12	323.079	193.282	213.786	342.348	206.913	221.676	4585.07	4238.63	17020.6	999.311	839.326	2881.16	1192.44	1013.82	3573.25
Spipo12G0038100.v2	SpNRT1.5	pseudo12	+	2861479	2863583	11.0944	14.7895	5.64936	2.26961	2.79461	1.39843	2.63759	3.11698	1.68534	8.79425	6.84199	10.0564	1.72368	1.3066	1.73363	1.82649	1.39874	1.79761	17.3523	11.5824	63.5972	3.78192	2.29352	10.7654	4.51284	2.77034	13.3513
Spipo13G0039300.v2	SpNRT3.1	pseudo13	-	2637713	2640626	3903.5	4739.81	2263.05	798.552	895.629	560.191	928.023	998.943	675.123	3542.3	4086.87	3556.47	694.295	780.459	613.103	735.705	835.5	635.73	9055.93	9818.12	27169.9	1973.73	1944.17	4599.17	2355.19	2348.36	5703.94
Spipo14G0009000.v2	SpNRT1.2A	pseudo14	+	527312	529608	30.2433	44.2561	25.5795	6.18697	8.3626	6.33191	7.19008	9.32725	7.63099	51.5965	41.0427	75.8401	10.113	7.83782	13.0741	10.7161	8.39058	13.5566	36.2105	50.2725	19.6392	7.89204	9.95488	3.32442	9.41731	12.0245	4.12298
Spipo15G0031400.v2	SpNRT1.22	pseudo15	-	3080060	3082306	0.377551	0.175737	0.396825	0.077237	0.033207	0.098229	0.089759	0.037038	0.118383	0.264739	9.72279	3.59467	0.051889	1.85674	0.619688	0.054984	1.98768	0.642559	0.229025	1.05442	1.65363	0.049916	0.208795	0.279917	0.059563	0.252203	0.347156
Spipo17G0047200.v2	SpNRT1.23	pseudo17	+	3358024	3359573	1381.11	1313.37	899.609	282.539	248.173	222.688	328.348	276.801	268.375	71.0609	73.0123	164.419	13.928	13.943	28.3443	14.7587	14.9263	29.3904	285.5	313.494	153.411	62.2245	62.0776	25.9687	74.2504	74.9834	32.2066
Spipo19G0017400.v2	SpNRT2.2	pseudo19	+	1264026	1265549	14.7703	76.6549	14.3891	3.02162	14.4846	3.56185	3.51152	16.1555	4.29262	292.388	264.94	305.932	57.3084	50.5948	52.7399	60.7264	54.163	54.6864	407.23	418.673	924.042	88.7553	82.9048	156.417	105.909	100.141	193.99
Spipo21G0020300.v2	SpNRT1.2B	pseudo21	+	1257680	1259788	0	0.374226	0.144981	0	0.070713	0.035888	0	0.07887	0.043251	0	0.983891	0.164808	0	0.187891	0.028411	0	0.201142	0.02946	0	0	0.547761	0	0	0.092722	0	0	0.114995
Spipo22G0027500.v2	SpNRT1.24	pseudo22	+	2022278	2024329	4.05772	8.06468	4.68179	0.830101	1.52389	1.15892	0.964687	1.69968	1.39669	1.00465	2.60442	2.32926	0.196914	0.49736	0.401543	0.208658	0.532436	0.416363	14.4744	9.66725	16.2976	3.15468	1.91429	2.75876	3.76437	2.31227	3.42145
Spipo22G0043000.v2	SpNRT1.25	pseudo22	-	2855519	2857536	28.6997	43.2892	44.0717	5.8712	8.1799	10.9094	6.8231	9.12347	13.1477	356.314	141.002	292.585	69.838	26.9268	50.4389	74.0034	28.8258	52.3004	46.2857	79.321	41.8354	10.0879	15.707	7.08167	12.0376	18.9725	8.78276
Spipo29G0014800.v2	SpNRT1.7	pseudo29	+	946495	948323	0	0.114114	0	0	0.021563	0	0	0.02405	0	0	0.181381	0	0	0.034638	0	0	0.037081	0	0.649851	3.8973	4.66186	0.141634	0.771737	0.789135	0.169007	0.93218	0.978693

## Sheet: Supplementary Table 6
Supplementary Table 6. Relative expression of SpNRT genes responds to salt stress
						Salt_0h									Salt_6h									Salt_12h									Salt_24h
Gene ID	Gene Name	Reference	Strand	Start	End	Coverage-1	Coverage-2	Coverage-3	FPKM-1	FPKM-2	FPKM-3	TPM-1	TPM-2	TPM-3	Coverage	Coverage	Coverage	FPKM	FPKM	FPKM	TPM	TPM	TPM	Coverage	Coverage	Coverage	FPKM	FPKM	FPKM	TPM	TPM	TPM	Coverage	Coverage	Coverage	FPKM	FPKM	FPKM	TPM	TPM	TPM
Spipo0G0088000.v2	SpNRT1.10	pseudo0	-	6547962	6551144	69.3726	59.9416	18.758	9.94824	11.818	2.96602	12.9097	15.102	3.5966	21.2643	43.267	31.0133	4.36026	9.18051	6.07594	5.46496	12.2596	6.85352	44.7439	33.4204	19.7208	8.79696	5.9929	3.94179	10.733	6.90746	5.19957	42.4713	34.8153	47.2781	6.86867	7.972	7.85269	9.3633	6.34013	9.69212
Spipo0G0188200.v2	SpNRT1.11	pseudo0	-	11521006	11522750	22.4158	15.1941	16.2924	3.2145	2.99564	2.57616	4.1714	3.82806	3.12386	6.34455	2.79934	7.92871	1.30095	0.593972	1.55335	1.63056	0.793183	1.75214	2.37822	7.82178	0	0.467574	1.40259	0	0.570477	1.61664	0	0.341914	9.81749	0	1.93688	0.064178	0	0.075379	1.78784	0
Spipo1G0085300.v2	SpNRT1.1	pseudo1	+	5346030	5347873	327.417	237.567	234.534	46.9526	46.8384	37.0845	60.9296	59.8537	44.9689	88.0429	91.7941	66.636	18.0532	19.4771	13.0549	22.6271	26.0095	14.7257	98.4375	120.219	61.7684	19.3535	21.5576	12.3463	23.6128	24.8474	16.2858	164.811	132.542	162.301	26.149	30.9355	26.9575	36.3344	24.1369	33.272
Spipo2G0059000.v2	SpNRT1.6	pseudo2	-	4660756	4662973	54.1166	60.9578	82.183	7.76048	12.0184	12.9948	10.0706	15.358	15.7576	21.2539	15.6064	12.5118	4.35813	3.31141	2.45124	5.46229	4.42202	2.76495	9.0107	8.51014	0	1.77157	1.52603	0	2.16145	1.75891	0	14.241	18.737	9.66216	3.69661	2.67308	1.60484	3.13959	3.41216	1.98076
Spipo3G0094500.v2	SpNRT1.9	pseudo3	+	7404260	7407742	8.01071	2.08009	8.03426	1.14876	0.410107	1.27038	1.49073	0.524067	1.54047	2.34628	3.71378	5.66738	0.481106	0.787999	1.11032	0.602997	1.05229	1.25242	2.52535	12.7252	0	0.496501	2.28186	0	0.60577	2.6301	0	7.54818	15.3598	6.6631	3.03031	1.41682	1.10671	1.66408	2.79713	1.36595
Spipo4G0003200.v2	SpNRT1.12	pseudo4	-	222375	226970	132.109	73.3047	152.354	18.9449	14.4527	24.0903	24.5845	18.4688	29.2121	141.097	132.153	125.651	28.932	28.0405	24.6168	36.262	37.445	27.7673	84.3771	88.0417	121.811	16.5891	15.7875	24.3476	20.24	18.1968	32.1166	109.595	59.3156	115.416	11.7023	20.5713	19.17	24.1614	10.8018	23.6605
Spipo4G0063900.v2	SpNRT1.13	pseudo4	+	5538377	5541091	37.9849	38.748	39.1946	5.44714	7.63951	6.19746	7.06867	9.76237	7.51507	25.6004	23.5206	15.784	5.24938	4.99067	3.09232	6.57934	6.66448	3.48806	44.9593	32.3787	12.9593	8.83931	5.80611	2.59031	10.7846	6.69217	3.41684	46.0527	23.3923	49.1236	4.61504	8.64423	8.15922	10.1528	4.25991	10.0704
Spipo4G0103800.v2	SpNRT1.14	pseudo4	-	7798272	7800211	31.2208	15.5679	0	4.47716	3.06935	0	5.80993	3.92226	0	13.7127	8.12986	0.555356	2.81181	1.72502	0.108802	3.52419	2.30357	0.122726	4.26691	9.58348	0	0.838903	1.7185	0	1.02353	1.98075	0	8.18253	4.86236	20.2382	0.95929	1.53588	3.36147	1.80393	0.885473	4.14887
Spipo4G0104400.v2	SpNRT1.15	pseudo4	-	7826302	7828322	94.4258	64.4862	68.8447	13.5409	12.714	10.8857	17.5719	16.247	13.2001	35.2443	35.5308	34.7497	7.22687	7.53903	6.80795	9.05784	10.0675	7.67921	38.9148	45.6142	62.6503	7.65091	8.17947	12.5225	9.33471	9.42772	16.5183	57.5608	70.6604	59.8462	13.9405	10.8043	9.94019	12.6899	12.8678	12.2686
Spipo4G0104600.v2	SpNRT1.16	pseudo4	-	7836888	7838383	34.2593	20.2023	37	4.91288	3.98307	5.85045	6.37536	5.08988	7.09429	22.2972	20.7687	31.1183	4.57205	4.40677	6.09652	5.73041	5.88475	6.87674	16.075	1.9139	0	3.16045	0.343198	0	3.856	0.395573	0	23.6296	26.1825	15.1319	5.16552	4.43536	2.51334	5.20943	4.76803	3.10207
Spipo4G0104900.v2	SpNRT1.17	pseudo4	-	7840223	7842218	189.16	157.82	283.951	27.1261	31.1156	44.8985	35.201	39.762	54.4441	98.0255	92.8251	103.923	20.1002	19.6959	20.36	25.1927	26.3017	22.9656	105.365	10.1953	65.116	20.7155	1.8282	13.0154	25.2745	2.1072	17.1684	95.2531	128.977	87.5179	25.4458	17.8793	14.5363	20.9996	23.4877	17.9414
Spipo4G0105600.v2	SpNRT1.18	pseudo4	-	7861420	7863417	23.9471	5.24477	19.9151	3.43409	1.03405	3.14899	4.45636	1.32139	3.81848	0	10.099	1.64391	0	2.14284	0.322065	0	2.86152	0.363283	7.07011	3.32637	0	1.39003	0.596481	0	1.69595	0.687509	0	6.28475	5.77491	3.91759	1.13933	1.17967	0.650694	1.38555	1.05166	0.803114
Spipo4G0105800.v2	SpNRT1.19	pseudo4	-	7869588	7871714	35.8781	25.3091	13.2867	5.14503	4.98991	2.1009	6.67661	6.37649	2.54756	12.278	17.1872	7.20522	2.51761	3.64683	1.4116	3.15546	4.86993	1.59226	12.3999	22.3469	26.9894	2.4379	4.00721	5.39464	2.97443	4.61875	7.11601	31.5187	28.1356	32.5777	5.55084	5.91615	5.41102	6.94865	5.1237	6.6785
Spipo4G0106200.v2	SpNRT1.20	pseudo4	-	7881390	7883362	11.1649	2.90814	0	1.60108	0.573366	0	2.0777	0.732691	0	5.48713	7.05776	4.84482	1.12514	1.49754	0.949168	1.4102	1.99979	1.07064	4.43493	133.238	0	0.871939	23.8921	0	1.06383	27.5382	0	5.49617	0	3.08699	0	1.03165	0.512735	1.21169	0	0.632839
Spipo4G0106600.v2	SpNRT1.21	pseudo4	-	7886885	7888290	50.6161	44.7609	57.9291	7.25851	8.82501	9.15977	9.41924	11.2773	11.1072	25.0264	44.0249	30.1569	5.13168	9.34132	5.90816	6.43181	12.4743	6.66427	30.3552	47.5852	40.0068	5.96804	8.53292	7.99655	7.28148	9.83511	10.5481	29.2745	25.9336	37.2066	5.11642	5.49492	6.17986	6.45391	4.72271	7.62744
Spipo5G0029200.v2	SpNRT1.3	pseudo5	-	2200927	2203057	870.537	348.906	860.723	124.838	68.7898	136.098	162	87.9049	165.033	2559.45	2074.83	2954.58	524.816	440.243	578.843	657.782	587.896	652.922	2679.06	3458.57	2309.89	526.722	620.186	461.7	642.642	714.831	609.023	1410.26	1269.39	1623.7	250.437	264.71	269.69	310.908	231.166	332.862
Spipo5G0063000.v2	SpNRT1.8	pseudo5	+	5553121	5556355	100.136	67.9885	77.1541	14.3598	13.4045	12.1996	18.6345	17.1294	14.7933	37.2175	61.9219	42.4945	7.63147	13.1388	8.32528	9.56494	17.5453	9.39073	55.0137	53.1639	48.7683	10.8161	9.53328	9.74781	13.1964	10.9881	12.8582	50.9978	54.9754	75.7896	10.846	9.57245	12.5883	11.2431	10.0114	15.537
Spipo8G0029500.v2	SpNRT1.4	pseudo8	-	2876617	2884084	3.84201	5.24473	2.1819	0.550955	1.03404	0.345003	0.714965	1.32138	0.418353	0	1.66198	6.59072	0	0.352643	1.29122	0	0.470916	1.45646	3.87576	6.71214	0	0.762001	1.20361	0	0.929701	1.38729	0	2.53071	0.998594	2.48949	0.197012	0.475022	0.413493	0.557924	0.181852	0.510351
Spipo8G0057400.v2	SpNRT2.1	pseudo8	+	4572055	4573747	227.958	207.697	235.676	32.6898	40.9494	37.2651	42.421	52.3283	45.1879	281.44	259.734	301.443	57.7094	55.1111	59.057	72.3304	73.5947	66.6149	132.812	129.122	108.097	26.1118	23.154	21.6064	31.8585	26.6875	28.5007	87.5686	67.8307	125.03	13.3823	16.4369	20.7669	19.3055	12.3525	25.6314
Spipo12G0038100.v2	SpNRT1.5	pseudo12	+	2861479	2863583	15.4204	6.6153	15.9866	2.21134	1.30426	2.52781	2.86961	1.66669	3.06523	29.7862	24.5371	13.0988	6.10767	5.20636	2.56624	7.65508	6.95251	2.89467	19.7186	21.6427	38.1217	3.87681	3.88093	7.61977	4.73001	4.47319	10.0511	11.9146	5.28643	9.38303	1.04296	2.2364	1.55848	2.62671	0.9627	1.92354
Spipo13G0039300.v2	SpNRT3.1	pseudo13	-	2637713	2640626	1133.55	905.412	982.234	162.554	178.51	155.311	210.944	228.114	188.331	847.205	953.088	1057.62	173.72	202.229	207.203	217.733	270.054	233.721	858.487	1309.64	1183.95	168.784	234.842	236.649	205.93	270.681	312.16	478.034	580.453	780.993	114.517	89.7284	129.72	105.388	105.705	160.105
Spipo14G0009000.v2	SpNRT1.2A	pseudo14	+	527312	529608	4.1883	6.2538	18.0199	0.600615	1.23299	2.84931	0.779408	1.57561	3.45509	27.4175	39.138	34.731	5.62198	8.30441	6.80429	7.04634	11.0896	7.67509	34.3889	56.4877	46.3433	6.76109	10.1293	9.26309	8.24906	11.6751	12.2188	35.4626	12.917	34.7386	2.54837	6.65644	5.76993	7.81814	2.35228	7.12148
Spipo15G0031400.v2	SpNRT1.22	pseudo15	-	3080060	3082306	154.056	84.8464	109.873	22.092	16.7282	17.3732	28.6684	21.3766	21.0668	108.442	133.38	123.655	22.2361	28.3009	24.2257	27.8698	37.7927	27.3261	93.1213	122.933	101.016	18.3083	22.0442	20.191	22.3375	25.4083	26.6337	107.669	53.1037	100.993	10.4768	20.2098	16.7745	23.7369	9.6706	20.7038
Spipo17G0047200.v2	SpNRT1.23	pseudo17	+	3358024	3359573	49.4293	31.9452	32.7741	7.0883	6.29828	5.18226	9.19837	8.04844	6.28403	30.1711	46.1739	56.2615	6.1866	9.7973	11.0224	7.75401	13.0832	12.433	43.4059	48.2067	105.804	8.5339	8.64436	21.1481	10.412	9.96356	27.8962	24.6797	26.0315	40.911	5.13573	4.63245	6.79514	5.44092	4.74053	8.38684
Spipo19G0017400.v2	SpNRT2.2	pseudo19	+	1264026	1265549	124.999	99.0066	203.091	17.9253	19.52	32.1129	23.2613	24.9442	38.9402	123.868	159.533	163.68	25.3992	33.8503	32.0672	31.8343	45.2033	36.1711	52.1207	55.6411	106.583	10.2473	9.97748	21.3037	12.5025	11.5001	28.1015	90.4049	114.258	99.4823	22.5418	16.9693	16.5236	19.9308	20.8072	20.3941
Spipo21G0020300.v2	SpNRT1.2B	pseudo21	+	1257680	1259788	0	0	4.59108	0	0	0.725943	0	0	0.880282	0	0	0	0	0	0	0	0	0	1.67286	0	0	0.328896	0	0	0.401279	0	0	0	0	0	0	0	0	0	0	0
Spipo22G0027500.v2	SpNRT1.24	pseudo22	+	2022278	2024329	17.0215	6.98197	4.47935	2.44094	1.37655	0.708276	3.16756	1.75907	0.858859	0	2.87725	0.910995	0	0.610504	0.178477	0	0.81526	0.201318	1.58406	3.28796	0	0.311437	0.589592	0	0.379978	0.679569	0	4.95993	0	3.7103	0	0.930994	0.616264	1.09347	0	0.760619
Spipo22G0043000.v2	SpNRT1.25	pseudo22	-	2855519	2857536	12.9259	7.87596	0	1.85362	1.55281	0	2.40541	1.98431	0	8.56614	10.3128	6.43504	1.75649	2.18819	1.26072	2.20151	2.92208	1.42206	10.3363	9.7866	0	2.03218	1.75492	0	2.47942	2.02273	0	14.1182	20.9916	16.1916	4.1414	2.65002	2.68935	3.11251	3.82272	3.31931
Spipo29G0014800.v2	SpNRT1.7	pseudo29	+	946495	948323	0	0	0	0	0	0	0	0	0	0	0	0	0	0	0	0	0	0	0	0	0	0	0	0	0	0	0	0	0	0	0	0	0	0	0	0

## Sheet: Supplementary Table 7
Supplementary Table 7. Relative expression of SpNRT genes responds to ABA stress
						Control			ABA
Gene ID	Gene Name	Reference	Strand	Start	End	Coverage	FPKM	TPM	Coverage	FPKM	TPM
Spipo0G0088000.v2	SpNRT1.10	pseudo0	-	6547962	6551144	13.0159	4.51948	3.53389	4.32431	2.3463	1.35942
Spipo0G0188200.v2	SpNRT1.11	pseudo0	-	11521006	11522750	3.69241	1.2821	1.00251	0.582838	0.316238	0.183225
Spipo1G0085300.v2	SpNRT1.1	pseudo1	+	5346030	5347873	272.959	94.7787	74.1098	46.652	25.3126	14.6658
Spipo2G0059000.v2	SpNRT1.6	pseudo2	-	4660756	4662973	38.6509	13.4206	10.4939	10.5507	5.72462	3.31678
Spipo3G0094500.v2	SpNRT1.9	pseudo3	+	7404260	7407742	5.8651	2.03652	1.5924	2.23483	1.21258	0.702557
Spipo4G0003200.v2	SpNRT1.12	pseudo4	-	222375	226970	40.5512	14.0805	11.0099	23.9497	12.9947	7.52898
Spipo4G0063900.v2	SpNRT1.13	pseudo4	+	5538377	5541091	37.771	13.1151	10.255	46.0475	24.9846	14.4758
Spipo4G0103800.v2	SpNRT1.14	pseudo4	-	7798272	7800211	10.444	3.62645	2.83561	1.00179	0.543558	0.314931
Spipo4G0104400.v2	SpNRT1.15	pseudo4	-	7826302	7828322	10.7934	3.74776	2.93046	4.49497	2.4389	1.41307
Spipo4G0104600.v2	SpNRT1.16	pseudo4	-	7836888	7838383	12.9874	4.50956	3.52613	4.9991	2.71243	1.57155
Spipo4G0104900.v2	SpNRT1.17	pseudo4	-	7840223	7842218	14.0337	4.87288	3.81022	4.14451	2.24874	1.30289
Spipo4G0105600.v2	SpNRT1.18	pseudo4	-	7861420	7863417	11.4871	3.98863	3.1188	0.383764	0.208224	0.120643
Spipo4G0105800.v2	SpNRT1.19	pseudo4	-	7869588	7871714	18.2108	6.32329	4.94433	6.20895	3.36888	1.95189
Spipo4G0106200.v2	SpNRT1.20	pseudo4	-	7881390	7883362	0.873346	0.303249	0.237118	0.959638	0.520684	0.301678
Spipo4G0106600.v2	SpNRT1.21	pseudo4	-	7886885	7888290	7.14103	2.47956	1.93883	2.58522	1.4027	0.812707
Spipo5G0029200.v2	SpNRT1.3	pseudo5	-	2200927	2203057	13.7929	4.78928	3.74486	79.5489	43.1619	25.0075
Spipo5G0063000.v2	SpNRT1.8	pseudo5	+	5553121	5556355	38.1246	13.2379	10.351	16.8076	9.11956	5.28376
Spipo8G0029500.v2	SpNRT1.4	pseudo8	-	2876617	2884084	2.5368	0.880846	0.688755	1.25504	0.680964	0.394543
Spipo8G0057400.v2	SpNRT2.1	pseudo8	+	4572055	4573747	225.881	78.432	61.3279	223.84	121.452	70.3679
Spipo12G0038100.v2	SpNRT1.5	pseudo12	+	2861479	2863583	0.795087	0.276076	0.21587	3.19654	1.73439	1.00489
Spipo13G0039300.v2	SpNRT3.1	pseudo13	-	2637713	2640626	1597.78	554.791	433.805	1715.21	930.644	539.204
Spipo14G0009000.v2	SpNRT1.2A	pseudo14	+	527312	529608	22.8164	7.92246	6.19476	60.2848	32.7095	18.9515
Spipo15G0031400.v2	SpNRT1.22	pseudo15	-	3080060	3082306	72.4637	25.1613	19.6743	78.1049	42.3784	24.5536
Spipo17G0047200.v2	SpNRT1.23	pseudo17	+	3358024	3359573	230.093	79.8945	62.4715	27.3607	14.8455	8.6013
Spipo19G0017400.v2	SpNRT2.2	pseudo19	+	1264026	1265549	25.7178	8.92993	6.98253	45.3353	24.5982	14.2519
Spipo21G0020300.v2	SpNRT1.2B	pseudo21	+	1257680	1259788	1.48141	0.514386	0.402211	0.696406	0.377859	0.218927
Spipo22G0027500.v2	SpNRT1.24	pseudo22	+	2022278	2024329	3.47295	1.2059	0.942924	0.307737	0.166973	0.096742
Spipo22G0043000.v2	SpNRT1.25	pseudo22	-	2855519	2857536	47.7732	16.5881	12.9707	23.4045	12.6989	7.35759
Spipo29G0014800.v2	SpNRT1.7	pseudo29	+	946495	948323	1.94655	0.675893	0.528498	0	0	0

## Sheet: Supplementary Table 8
Spplementary Table 8. SpNRT1.1 and AtNRT1.1 Expression in different Arabidopsis transgene lines.
		SpNRT1.1			AtNRT1.1			Actin			Average Cq(SpNRT1.1)	Average Cq(AtNRT1.1)	Average Cq(Actin)	ΔCT SpNRT1.1	ΔCT AtNRT1.1	SpNRT1.1	AtNRT1.1
1	Col-0	-	36.28	-	33.33	33.45	32.64	20.59	20.73	20.72	36.28	33.14	20.68	15.6	12.46	2.01341e-05	0.000177487
2		37.13	-	36.95	33.47	33.82	33.94	21.43	21.34	21.33	37.04	33.7433	21.3667	15.6733	12.3767	1.91362e-05	0.000188041
3		-	-	37.29	33.34	33.6	34.3	21.59	21.54	21.48	37.29	33.7467	21.5367	15.7533	12.21	1.8104e-05	0.000211069
4		-	-	-	34.81	35.07	35.2	22.09	21.95	22.01	#DIV/0!	35.0267	22.0167	#DIV/0!	13.01	0	0.000121227
5		-	37.71	-	33.66	33.52	33.96	20.85	20.86	20.66	37.71	33.7133	20.79	16.92	12.9233	8.06441e-06	0.000128733
6	Chl1-5	37.29	37.63	-	-	-	37.82	21.18	20.47	20.57	37.46	37.82	20.74	16.72	17.08	9.26357e-06	7.21785e-06
7		-	-	-	38.12	-	-	20.05	19.7	19.8	#DIV/0!	38.12	19.85	#DIV/0!	18.27	0	3.1636e-06
8		-	-	36.07	-	-	37.98	20.43	20.17	20.05	36.07	37.98	20.2167	15.8533	17.7633	1.68916e-05	4.49473e-06
9		-	-	-	-	-	-	20.04	19.97	19.88	#DIV/0!	#DIV/0!	19.9633	#DIV/0!	#DIV/0!	0	0
10		-	36.6	-	38.82	-	-	20.48	20.25	20.18	36.6	38.82	20.3033	16.2967	18.5167	1.24227e-05	2.66642e-06
11	SpNRT1.1-OE3-Chl1-5	27.36	27.02	27.18	-	-	-	20.53	20.04	20.73	27.1867	#DIV/0!	20.4333	6.75333	#DIV/0!	0.00926924	0
12		29.77	29.63	29.58	-	-	-	20.99	20.67	20.82	29.66	#DIV/0!	20.8267	8.83333	#DIV/0!	0.00219231	0
13		26.94	26.94	26.54	-	38.7	37.21	20.83	20.48	20.58	26.8067	37.955	20.63	6.17667	17.325	0.0138241	6.09053e-06
14		29.48	29.36	29.41	-	-	-	20.05	19.95	19.61	29.4167	#DIV/0!	19.87	9.54667	#DIV/0!	0.00133711	0
15		28.91	28.73	28.72	-	-	39.84	20.18	20.09	19.85	28.7867	39.84	20.04	8.74667	19.8	0.00232804	1.09548e-06
16	SpNRT1.1-OE5-Chl1-5	31.06	31.27	30.97	-	-	-	19.85	20.13	19.98	31.1	#DIV/0!	19.9867	11.1133	#DIV/0!	0.000451391	0
17		32.78	31.8	31.95	-	-	-	20.3	20.38	20.44	32.1767	#DIV/0!	20.3733	11.8033	#DIV/0!	0.000279797	0
18		32.35	32.09	32.53	-	-	39.09	21.1	21.16	20.83	32.3233	39.09	21.03	11.2933	18.06	0.000398445	3.6593e-06
19		31.53	32.25	31.55	-	-	-	20.72	20.44	20.62	31.7767	#DIV/0!	20.5933	11.1833	#DIV/0!	0.000430013	0
20		31.71	31.47	31.44	-	-	-	20.58	20.67	20.51	31.54	#DIV/0!	20.5867	10.9533	#DIV/0!	0.000504334	0
21	SpNRT1.1-OE6-Col-0	22.76	22.45	22.63	33.75	33.87	33.81	20.97	21.04	21.17	22.6133	33.81	21.06	1.55333	12.75	0.340722	0.000145167
22		22.68	22.56	22.3	33.08	34.17	33.75	20.86	20.58	20.55	22.5133	33.6667	20.6633	1.85	13.0033	0.277392	0.000121789
23		23.34	23.33	23.24	33.11	33.98	33.56	20.59	20.55	20.63	23.3033	33.55	20.59	2.71333	12.96	0.152477	0.000125502
24		23.41	23.29	23.39	35.33	35.92	34.26	22.42	22.45	22.58	23.3633	35.17	22.4833	0.88	12.6867	0.543367	0.000151682
25		24.58	24.52	24.61	34.13	35	33.08	21.3	21.57	20.75	24.57	34.07	21.2067	3.36333	12.8633	0.0971708	0.000134199
26	SpNRT1.1-OE10-Col-0	32.98	32.38	32.61	32.99	34.54	33.31	20.51	20.26	21.2	32.6567	33.6133	20.6567	12	12.9567	0.000244141	0.000125792
27		32.73	32.7	33.76	33.37	33.38	32.6	20.46	21.07	21.06	33.0633	33.1167	20.8633	12.2	12.2533	0.000212537	0.000204823
28		32.83	33.55	32.93	33	35.34	34.92	21.61	21.74	21.55	33.1033	34.42	21.6333	11.47	12.7867	0.000352522	0.000141524
29		33.45	32.44	32.25	34.38	33.82	33.38	21.99	21.85	21.25	32.7133	33.86	21.6967	11.0167	12.1633	0.000482673	0.000218008
30		30.52	30.64	30.39	32.93	33.38	33.37	20.43	20.91	20.24	30.5167	33.2267	20.5267	9.99	12.7	0.000983355	0.000150286
